# Supplementary material
Source: Research Square preprint supplement (doi:10.21203/rs.3.rs-9142555/v1)
Supplement: Supplementary file 1 [file 6dfd73f23746e1a2f020c009.docx]

**Figure 1.** Day–night differences in haul-out time proportions across individual rehabilitated juvenile grey seals.
